# Supplementary material
Source: Springer Nature journal article supplement (https://www.springermedizin.de/resource/supplementary/12876_2001_14_MOESM1_ESM.pdf/9436814)

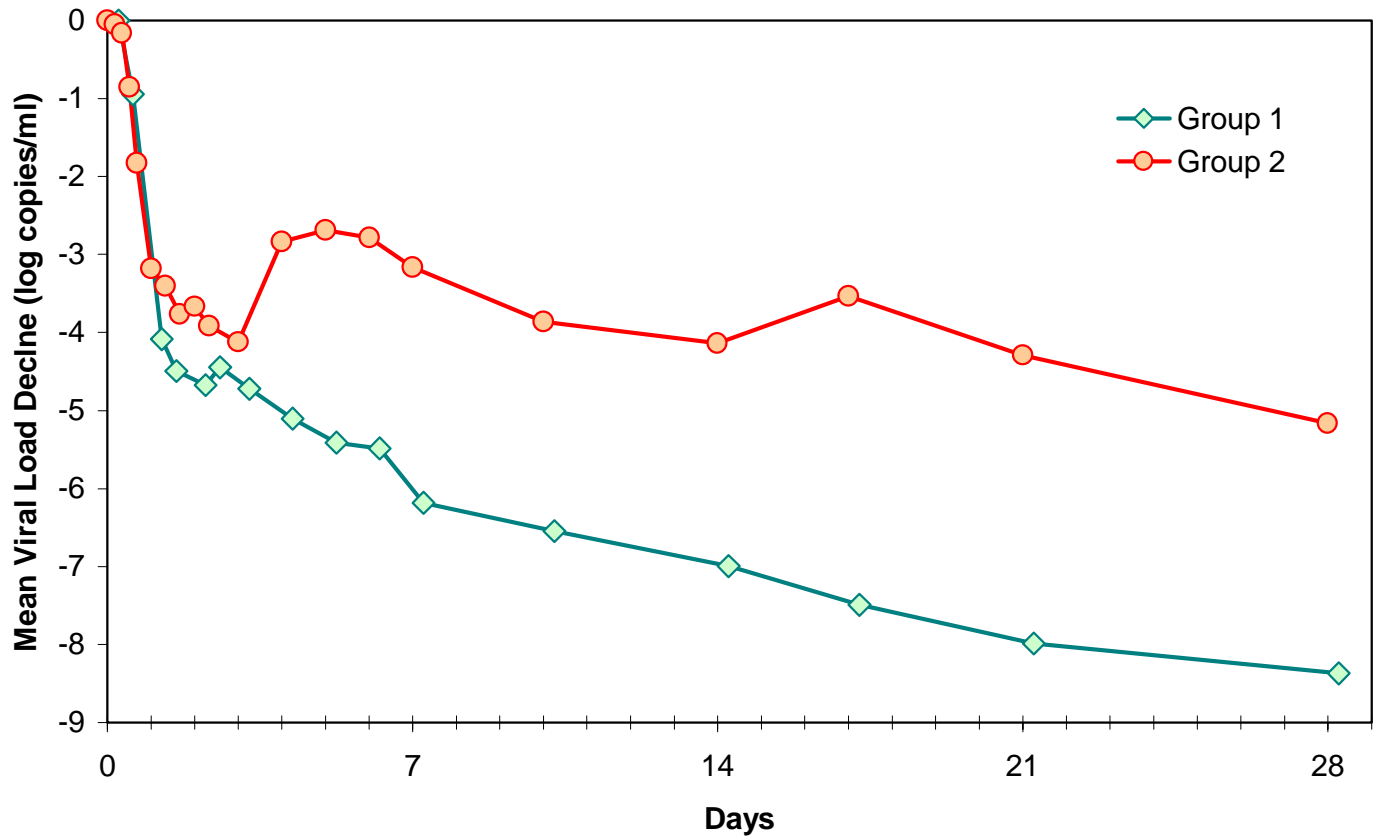

Supplement: MOESM1 [file 9436814]
